# Supplementary material
Source: ML conference proceedings conference paper supplement (https://proceedings.mlr.press/v97/franc19a.html)
Supplement: Supplementary file 1 [file franc19a-supp.pdf]

---

# On Discriminative Learning of Prediction Uncertainty

---

Vojtech Franc Daniel Prusa

## A. Supplementary materials

### A.1. Proof of Theorem 1

#### Task 1

$$\max_{h,c} \phi(c) \quad \text{s.t.} \quad R_S(h, c) \leq \lambda, \quad (1)$$

**Theorem 1** *Let  $(h, c)$  be an optimal solution to (1). Then,  $(h_B, c)$ , where  $h_B$  is the optimal Bayes classifier, is also optimal to (1).*

**Proof 1** *It is sufficient to show that  $(h_B, c)$  is feasible to (1), i.e., that  $R_S(h_B, c) \leq \lambda$ . Then  $(h_B, c)$  attains the maximum objective value  $\phi(c)$ . Derive*

$$\begin{aligned} R_S(h_B, c) &= \frac{1}{\phi(c)} \int_{\mathcal{X}} \sum_{y \in \mathcal{Y}} p(x, y) \ell(y, h_B(x)) c(x) dx \\ &= \frac{1}{\phi(c)} \int_{\mathcal{X}} p(x) c(x) \left( \sum_{y \in \mathcal{Y}} p(y | x) \ell(y, h_B(x)) \right) dx \\ &\leq \frac{1}{\phi(c)} \int_{\mathcal{X}} p(x) c(x) \left( \sum_{y \in \mathcal{Y}} p(y | x) \ell(y, h(x)) \right) dx \\ &= \frac{1}{\phi(c)} \int_{\mathcal{X}} \sum_{y \in \mathcal{Y}} p(x, y) \ell(y, h(x)) c(x) dx \\ &= R_S(h, c) \leq \lambda. \end{aligned}$$

□

### A.2. Proof of Theorem 2

The presented proof of the theorem uses Lemmas 2 and 3, both derived based on Lemma 1 bellow.

**Lemma 1** *Let  $f : \mathcal{X} \rightarrow \mathbb{R}_+^1$  and  $g : \mathcal{X} \rightarrow \mathbb{R}$  be measurable functions such that  $\int_{\mathcal{X}} f(x) dx > 0$  and  $g(x) > 0$  for all  $x \in \mathcal{X}$ . Then it holds  $\int_{\mathcal{X}} g(x) f(x) dx > 0$ .*

**Proof 2** *For  $n \in \mathbb{N}_+$ , define functions*

$$f_n(x) = \begin{cases} f(x) & \text{if } g(x) \geq \frac{1}{n}, \\ 0 & \text{otherwise.} \end{cases}$$

*The sequence  $\{f_n\}_{n=1}^{\infty}$  is monotone and converges to  $f$ . Using the monotone convergence theorem (Stein & Shakarchi, 2009), derive*

$$0 < \int_{\mathcal{X}} f(x) dx = \lim_{n \rightarrow \infty} \int_{\mathcal{X}} f_n(x) dx,$$

---

<sup>1</sup>We use  $\mathbb{R}$ ,  $\mathbb{R}_+$  and  $\mathbb{N}_+$  to denote the set of real numbers, non-negative real numbers and positive integers, respectively.

which implies there is a  $k \in \mathbb{N}_+$  such that  $\int_{\mathcal{X}} f_k(x) dx > 0$ , hence we conclude

$$\int_{\mathcal{X}} g(x)f(x)dx \geq \int_{\mathcal{X}} g(x)f_k(x)dx \geq \int_{\mathcal{X}} \frac{1}{k} f_k(x)dx > 0.$$

□

**Lemma 2** Let  $f : \mathcal{X} \rightarrow \mathbb{R}_+$  and  $g : \mathcal{X} \rightarrow \mathbb{R}$  be measurable functions such that  $\int_{\mathcal{X}} f(x)dx > 0$  and  $g(x) > b$  for all  $x \in \mathcal{X}$  and some  $b \in \mathbb{R}$ . Then it holds  $\int_{\mathcal{X}} g(x)f(x)dx > b \int_{\mathcal{X}} f(x)dx$ .

**Proof 3** By Lemma 1, we have

$$\int_{\mathcal{X}} (g(x) - b)f(x)dx > 0,$$

thus

$$\int_{\mathcal{X}} g(x)f(x)dx = \int_{\mathcal{X}} (g(x) - b)f(x)dx + \int_{\mathcal{X}} bf(x)dx > b \int_{\mathcal{X}} f(x)dx.$$

□

**Lemma 3** Let  $f : \mathcal{X} \rightarrow \mathbb{R}_+$  and  $g : \mathcal{X} \rightarrow \mathbb{R}$  be measurable functions such that  $\int_{\mathcal{X}} g(x)f(x)dx > 0$  and  $g(x) < 1$  for all  $x \in \mathcal{X}$ . Then it holds  $\int_{\mathcal{X}} f(x)dx > \int_{\mathcal{X}} g(x)f(x)dx$ .

**Proof 4**  $\int_{\mathcal{X}} g(x)f(x)dx > 0$  implies  $\int_{\mathcal{X}} f(x)dx > 0$ . Since it holds  $\forall x \in \mathcal{X} : (1 - g(x)) > 0$ , Lemma 1 yields

$$0 < \int_{\mathcal{X}} (1 - g(x))f(x)dx = \int_{\mathcal{X}} f(x)dx - \int_{\mathcal{X}} g(x)f(x)dx,$$

which implies  $\int_{\mathcal{X}} f(x)dx > \int_{\mathcal{X}} g(x)f(x)dx$ .

□

**Task 2**

$$\max_{c \in [0,1]^{\mathcal{X}}} \int_{\mathcal{X}} p(x)c(x)dx \quad \text{s.t.} \quad \int_{\mathcal{X}} p(x)c(x)\bar{r}(x)dx \leq 0. \quad (2)$$

**Theorem 2** A selection function  $c^* : \mathcal{X} \rightarrow [0, 1]$  is an optimal solution to (2) if and only if it holds

$$\int_{\mathcal{X}_{\bar{r}(x) < b}} p(x)c^*(x)dx = \int_{\mathcal{X}_{\bar{r}(x) < b}} p(x)dx, \quad (3)$$

$$\int_{\mathcal{X}_{\bar{r}(x) = b}} p(x)c^*(x)dx = \begin{cases} -\frac{\rho(\mathcal{X}_{\bar{r}(x) < b})}{b} & \text{if } b > 0, \\ \int_{\mathcal{X}_{\bar{r}(x) = 0}} p(x)dx & \text{if } b = 0, \end{cases} \quad (4)$$

$$\int_{\mathcal{X}_{\bar{r}(x) > b}} p(x)c^*(x)dx = 0 \quad (5)$$

where

$$\rho(\mathcal{X}') = \int_{\mathcal{X}'} p(x)\bar{r}(x) dx \quad (6)$$

is the conditional expectation of  $\bar{r}(x)$  over inputs in  $\mathcal{X}' \subseteq \mathcal{X}$ , and

$$b = \sup \{a \mid \rho(\mathcal{X}_{\bar{r}(x) \leq a}) \leq 0\} \geq 0. \quad (7)$$

**Proof 5** Let  $F(c) = \int_{\mathcal{X}} p(x)c(x)dx$  denote the objective function of (2). Observe that  $b \geq 0$ , because  $\rho(\mathcal{X}_{\bar{r}(x) \leq 0}) \leq 0$ .

**Case I**  $b > 0$ .

**Claim I** Each  $c^* : \mathcal{X} \rightarrow [0, 1]$  which fulfils (3), (4) and (5) is feasible to (2) and

$$F(c^*) = \int_{\mathcal{X}_{\bar{r}(x) < b}} p(x) dx - \frac{1}{b} \rho(\mathcal{X}_{\bar{r}(x) < b}). \quad (8)$$

*Proof of Claim I.*

Equality (8) is simply obtained by summing LHS and RHS of (3), (4) and (5). Next, verify the constraint of (2).

Observe that  $\int_{\mathcal{X}_{\bar{r}(x) < b}} p(x)(c^*(x) - 1) dx \stackrel{(3)}{=} 0$  implies  $\int_{\mathcal{X}_{\bar{r}(x) < b}} p(x)(c^*(x) - 1)\bar{r}(x) dx = 0$  and

$$\int_{\mathcal{X}_{\bar{r}(x) < b}} p(x)c^*(x)\bar{r}(x) dx = \int_{\mathcal{X}_{\bar{r}(x) < b}} p(x)\bar{r}(x) dx \stackrel{(6)}{=} \rho(\mathcal{X}_{\bar{r}(x) < b}). \quad (9)$$

If  $b < \infty$ , then

$$\begin{aligned} \int_{\mathcal{X}} p(x)c^*(x)\bar{r}(x) dx &\stackrel{(5)}{=} \int_{\mathcal{X}_{\bar{r}(x) < b}} p(x)c^*(x)\bar{r}(x) dx + \int_{\mathcal{X}_{\bar{r}(x) = b}} p(x)c^*(x)\bar{r}(x) dx \\ &\stackrel{(9)}{=} \int_{\mathcal{X}_{\bar{r}(x) < b}} p(x)\bar{r}(x) dx + b \int_{\mathcal{X}_{\bar{r}(x) = b}} p(x)c^*(x) dx \stackrel{(4),(6)}{=} \rho(\mathcal{X}_{\bar{r}(x) < b}) - \rho(\mathcal{X}_{\bar{r}(x) < b}) = 0. \end{aligned} \quad (10)$$

If  $b = \infty$ , then

$$\int_{\mathcal{X}} p(x)c^*(x)\bar{r}(x) dx = \int_{\mathcal{X}_{\bar{r}(x) < b}} p(x)c^*(x)\bar{r}(x) dx \stackrel{(9)}{=} \rho(\mathcal{X}_{\bar{r}(x) < b}) \leq 0.$$

**Claim II** Let  $c : \mathcal{X} \rightarrow [0, 1]$  be a feasible solution to (2) that violates at least one of the constraints (3), (4) and (5). Then,  $F(c) < F(c^*)$  where  $c^* : \mathcal{X} \rightarrow [0, 1]$  is a confidence function fulfilling (3), (4), (5), and, w.l.o.g.,

$$\forall x \in \mathcal{X}_{\bar{r}(x) < b} : c^*(x) = 1. \quad (11)$$

To prove Claim II, distinguish three cases.

**Case I.1** Condition (5) is violated (observe that this is possible only if  $b < \infty$ ), i.e.

$$\int_{\mathcal{X}_{\bar{r}(x) > b}} p(x)c(x) dx > 0. \quad (12)$$

Inequality (12) and Lemma 2 (applied to  $f(x) = p(x)c(x)$  and  $g(x) = \bar{r}(x)$ ) yield

$$\int_{\mathcal{X}_{\bar{r}(x) > b}} p(x)c(x)\bar{r}(x) dx > b \int_{\mathcal{X}_{\bar{r}(x) > b}} p(x)c(x) dx.$$

Hence, we can write

$$\int_{\mathcal{X}_{\bar{r}(x) > b}} p(x)c(x)\bar{r}(x) dx = b' \int_{\mathcal{X}_{\bar{r}(x) > b}} p(x)c(x) dx \quad (13)$$

for a suitable real number  $b'$  such that

$$b' > b > 0. \quad (14)$$

Based on the constraint of (2), derive

$$\begin{aligned} \int_{\mathcal{X}} p(x)c(x)\bar{r}(x)dx &\stackrel{(13)}{=} \int_{\mathcal{X}_{\bar{r}(x)<b}} p(x)c(x)\bar{r}(x)dx + b \int_{\mathcal{X}_{\bar{r}(x)=b}} p(x)c(x)dx + b' \int_{\mathcal{X}_{\bar{r}(x)>b}} p(x)c(x)dx \\ &\stackrel{(2)}{\leq} 0 \stackrel{(10)}{=} \int_{\mathcal{X}_{\bar{r}(x)<b}} p(x)c^*(x)\bar{r}(x)dx + b \int_{\mathcal{X}_{\bar{r}(x)=b}} p(x)c^*(x)dx. \end{aligned} \quad (15)$$

Let  $\sigma(x) = \frac{1}{b}\bar{r}(x)$ . Inequality (15) can be rearranged and upper bounded as

$$\begin{aligned} \int_{\mathcal{X}_{\bar{r}(x)=b}} p(x)c(x)dx - \int_{\mathcal{X}_{\bar{r}(x)=b}} p(x)c^*(x)dx + \frac{b'}{b} \int_{\mathcal{X}_{\bar{r}(x)>b}} p(x)c(x)dx &\stackrel{(15)}{\leq} \int_{\mathcal{X}_{\bar{r}(x)<b}} p(x)(c^*(x) - c(x))\sigma(x)dx \\ &\leq \int_{\mathcal{X}_{\bar{r}(x)<b}} p(x)c^*(x)dx - \int_{\mathcal{X}_{\bar{r}(x)<b}} p(x)c(x)dx \end{aligned} \quad (16)$$

where the second inequality follows from  $\forall x \in \mathcal{X}_{\bar{r}(x)<b} : \sigma(x) \leq 1$ . From this we get

$$\int_{\mathcal{X}_{\bar{r}(x)\leq b}} p(x)c(x)dx \stackrel{(16)}{\leq} \int_{\mathcal{X}_{\bar{r}(x)\leq b}} p(x)c^*(x)dx - \frac{b'}{b} \int_{\mathcal{X}_{\bar{r}(x)>b}} p(x)c(x)dx. \quad (17)$$

Now, derive

$$\begin{aligned} F(c) &= \int_{\mathcal{X}_{\bar{r}(x)\leq b}} p(x)c(x)dx + \int_{\mathcal{X}_{\bar{r}(x)>b}} p(x)c(x)dx \stackrel{(17)}{\leq} \int_{\mathcal{X}_{\bar{r}(x)\leq b}} p(x)c^*(x)dx - \left(\frac{b'}{b} - 1\right) \int_{\mathcal{X}_{\bar{r}(x)>b}} p(x)c(x)dx \\ &\stackrel{(12),(14)}{<} \int_{\mathcal{X}_{\bar{r}(x)\leq b}} p(x)c^*(x)dx = F(c^*). \end{aligned}$$

**Case 1.2** Condition (5) holds, condition (4) is violated.

If  $\int_{\mathcal{X}_{\bar{r}(x)=b}} p(x)c(x)dx < -\frac{\rho(\mathcal{X}_{\bar{r}(x)<b})}{b}$ , then obviously  $F(c) < F(c^*)$ . Hence, assume

$$\int_{\mathcal{X}_{\bar{r}(x)=b}} p(x)c(x)dx > -\frac{\rho(\mathcal{X}_{\bar{r}(x)<b})}{b}. \quad (18)$$

Analogically to (15), derive

$$\int_{\mathcal{X}_{\bar{r}(x)<b}} p(x)c(x)\bar{r}(x)dx + b \int_{\mathcal{X}_{\bar{r}(x)=b}} p(x)c(x)dx \stackrel{(2)}{\leq} 0 \stackrel{(10)}{=} \int_{\mathcal{X}_{\bar{r}(x)<b}} p(x)c^*(x)\bar{r}(x)dx + b \int_{\mathcal{X}_{\bar{r}(x)=b}} p(x)c^*(x)dx,$$

and

$$\int_{\mathcal{X}_{\bar{r}(x)<b}} p(x)c(x)\sigma(x)dx + \int_{\mathcal{X}_{\bar{r}(x)=b}} p(x)c(x)dx \leq \int_{\mathcal{X}_{\bar{r}(x)<b}} p(x)c^*(x)\sigma(x)dx + \int_{\mathcal{X}_{\bar{r}(x)=b}} p(x)c^*(x)dx \quad (19)$$

where  $\sigma(x) = \frac{1}{b}\bar{r}(x) < 1$  for all  $x \in \mathcal{X}_{\bar{r}(x)<b}$ .

Denote and derive

$$\Delta = \int_{\mathcal{X}_{\bar{r}(x)=b}} p(x)c(x)dx - \int_{\mathcal{X}_{\bar{r}(x)=b}} p(x)c^*(x)dx \stackrel{(4)}{=} \int_{\mathcal{X}_{\bar{r}(x)=b}} p(x)c(x)dx + \frac{\rho(\mathcal{X}_{\bar{r}(x)<b})}{b} \stackrel{(18)}{>} 0. \quad (20)$$

Then, (19) can be rewritten as

$$\int_{\mathcal{X}_{\bar{r}(x) < b}} p(x)(c^*(x) - c(x))\sigma(x)dx \geq \Delta \stackrel{(20)}{>} 0. \quad (21)$$

Inequality (21) and Lemma 3 (applied to  $g(x) = \sigma(x) < 1$  and  $f(x) = p(x)(c^*(x) - c(x)) \stackrel{(11)}{\geq} 0$  over  $\mathcal{X}_{\bar{r}(x) < b}$ ) yield

$$\int_{\mathcal{X}_{\bar{r}(x) < b}} p(x)(c^*(x) - c(x))dx > \Delta. \quad (22)$$

Now, combine and rearrange (20) and (22) to obtain

$$F(c^*) = \int_{\mathcal{X}_{\bar{r}(x) < b}} p(x)c^*(x)dx + \int_{\mathcal{X}_{\bar{r}(x) = b}} p(x)c^*(x)dx \stackrel{(22)}{>} \Delta \stackrel{(20)}{=} \int_{\mathcal{X}_{\bar{r}(x) < b}} p(x)c(x)dx + \int_{\mathcal{X}_{\bar{r}(x) = b}} p(x)c(x)dx = F(c).$$

**Case 1.3** Conditions (4) and (5) hold, condition (3) is violated, i.e.

$$\int_{\mathcal{X}_{\bar{r}(x) < b}} p(x)c(x)dx < \int_{\mathcal{X}_{\bar{r}(x) < b}} p(x)dx. \quad (23)$$

Then,

$$F(c^*) = \int_{\mathcal{X}_{\bar{r}(x) < b}} p(x)c^*(x)dx - \frac{\rho(\mathcal{X}_{\bar{r}(x) < b})}{b} \stackrel{(23)}{>} \int_{\mathcal{X}_{\bar{r}(x) < b}} p(x)c(x)dx - \frac{\rho(\mathcal{X}_{\bar{r}(x) < b})}{b} = F(c).$$

**Case 2**  $b = 0$ .

This occurs only if  $\int_{\mathcal{X}_{\bar{r}(x) < 0}} p(x)\bar{r}(x)dx = 0$ . The constraint of (2) implies

$$\int_{\mathcal{X}_{\bar{r}(x) > 0}} p(x)c(x)\bar{r}(x)dx = 0,$$

thus

$$\int_{\mathcal{X}_{\bar{r}(x) > 0}} p(x)c(x)dx = 0,$$

which confirms condition (5).

Finally, the obvious equations

$$\begin{aligned} \max_{c: \mathcal{X} \rightarrow [0,1]} \int_{\mathcal{X}_{\bar{r}(x) < 0}} p(x)c(x)dx &= \int_{\mathcal{X}_{\bar{r}(x) < 0}} p(x)dx, \text{ and} \\ \max_{c: \mathcal{X} \rightarrow [0,1]} \int_{\mathcal{X}_{\bar{r}(x) = 0}} p(x)c(x)dx &= \int_{\mathcal{X}_{\bar{r}(x) = 0}} p(x)dx \end{aligned}$$

confirm condition (3) and (4), respectively.

□

### A.3. Proof of Theorem 3

#### Task 3

$$\min_{s: \mathcal{X} \rightarrow \mathbb{R}} E(s) \quad (24)$$

$$\text{where } E(s) = \int_{\mathcal{X}} p(x)r(x) \int_{\mathcal{X}} p(z) \llbracket s(x) \leq s(z) \rrbracket dz dx. \quad (25)$$

**Remark 1** For the sake of simplicity, for predicates  $\varphi_1(x, z), \dots, \varphi_k(x, z)$  and a function  $f : \mathcal{X} \times \mathcal{X} \rightarrow \mathbb{R}$ , we write

$$\int_{\mathcal{X}} \int_{\substack{\varphi_1(x, z) \\ \vdots \\ \varphi_k(x, z)}} f(x, z) dz dx$$

to represent

$$\int_{\mathcal{X}} \int_{\mathcal{X}} f(x, z) [\varphi_1(x, z) \wedge \dots \wedge \varphi_k(x, z)] dz dx.$$

**Theorem 3** A function  $s^* : \mathcal{X} \rightarrow \mathbb{R}$  is an optimal solution to  $\min_{s: \mathcal{X} \rightarrow \mathbb{R}} E(s)$  if and only if

$$\int_{\mathcal{X}} \int_{\substack{z \neq x \\ s^*(z) = s^*(x)}} \max\{r(x), r(z)\} p(x) p(z) dz dx = 0 \quad (26)$$

and

$$\int_{\mathcal{X}} \int_{\substack{r(z) < r(x) \\ s^*(z) > s^*(x)}} (r(x) - r(z)) p(x) p(z) dz dx = 0. \quad (27)$$

**Proof 6** We first list four equalities to be used later, all of them easy to verify (note that  $s : \mathcal{X} \rightarrow \mathbb{R}$  is any measurable function):

$$\int_{\mathcal{X}} r(x) p(x) \int_{\substack{r(z) > r(x) \\ s(z) < s(x)}} p(z) dz dx = \int_{\mathcal{X}} p(z) \int_{\substack{r(x) < r(z) \\ s(x) > s(z)}} r(x) p(x) dx dz = \int_{\mathcal{X}} p(x) \int_{\substack{r(z) < r(x) \\ s(z) > s(x)}} r(z) p(z) dz dx, \quad (28)$$

$$\begin{aligned} \int_{\mathcal{X}} \int_{\substack{r(z) < r(x) \\ s(z) = s(x)}} r(x) p(x) p(z) dz dx &= \frac{1}{2} \int_{\mathcal{X}} \int_{\substack{z \neq x \\ s(z) = s(x)}} \max\{r(x), r(z)\} p(x) p(z) dz dx \\ &\quad - \frac{1}{2} \int_{\mathcal{X}} \int_{\substack{z \neq x \\ r(z) = r(x) \\ s(z) = s(x)}} \max\{r(x), r(z)\} p(x) p(z) dz dx, \end{aligned} \quad (29)$$

$$\int_{\mathcal{X}} \int_{\substack{r(z) = r(x) \\ s(z) < s(x)}} r(x) p(x) p(z) dz dx = \frac{1}{2} \int_{\mathcal{X}} \int_{r(z) = r(x)} r(x) p(x) p(z) dz dx - \frac{1}{2} \int_{\mathcal{X}} \int_{\substack{r(z) = r(x) \\ s(z) = s(x)}} r(x) p(x) p(z) dz dx, \quad (30)$$

$$\int_{\mathcal{X}} \int_{\substack{r(z) = r(x) \\ s(z) = s(x)}} r(x) p(x) p(z) dz dx = 2 \int_{\mathcal{X}} \int_{\substack{z > x \\ r(z) = r(x) \\ s(z) = s(x)}} r(x) p(x) p(z) dz dx + \int_{\mathcal{X}} \int_{z=x} r(x) p(x) p(z) dz dx. \quad (31)$$

Since  $\operatorname{argmin}_{s: \mathcal{X} \rightarrow \mathbb{R}} E(s) = \operatorname{argmin}_{s: \mathcal{X} \rightarrow \mathbb{R}} (E(s) - E(r))$ , it suffices to analyze minimizers of  $E(s) - E(r)$  instead of

$E(s)$ . Derive

$$\begin{aligned}
 E(s) - E(r) &= \int_{\mathcal{X}} \int_{s(z) \geq s(x)} r(x)p(x)p(z) dz dx - \int_{\mathcal{X}} \int_{r(z) \geq r(x)} r(x)p(x)p(z) dz dx \\
 &= \int_{\mathcal{X}} \int_{\substack{r(z) < r(x) \\ s(z) \geq s(x)}} r(x)p(x)p(z) dz dx - \int_{\mathcal{X}} \int_{\substack{r(z) \geq r(x) \\ s(z) < s(x)}} r(x)p(x)p(z) dz dx \\
 &= \int_{\mathcal{X}} \int_{\substack{r(z) < r(x) \\ s(z) > s(x)}} r(x)p(x)p(z) dz dx - \int_{\mathcal{X}} \int_{\substack{r(z) > r(x) \\ s(z) < s(x)}} r(x)p(x)p(z) dz dx \\
 &\quad + \int_{\mathcal{X}} \int_{\substack{r(z) < r(x) \\ s(z) = s(x)}} r(x)p(x)p(z) dz dx - \int_{\mathcal{X}} \int_{\substack{r(z) = r(x) \\ s(z) < s(x)}} r(x)p(x)p(z) dz dx \\
 &= F_1(s) + F_2(s)
 \end{aligned}$$

where

$$\begin{aligned}
 F_1(s) &= \int_{\mathcal{X}} \int_{\substack{r(z) < r(x) \\ s(z) > s(x)}} r(x)p(x)p(z) dz dx - \int_{\mathcal{X}} \int_{\substack{r(z) > r(x) \\ s(z) < s(x)}} r(x)p(x)p(z) dz dx \\
 &\stackrel{(28)}{=} \int_{\mathcal{X}} \int_{\substack{r(z) < r(x) \\ s(z) > s(x)}} r(x)p(x)p(z) dz dx - \int_{\mathcal{X}} \int_{\substack{r(z) < r(x) \\ s(z) > s(x)}} r(z)p(x)p(z) dz dx \\
 &= \int_{\mathcal{X}} \int_{\substack{r(z) < r(x) \\ s(z) > s(x)}} (r(x) - r(z)) p(x)p(z) dz dx
 \end{aligned}$$

and

$$\begin{aligned}
 F_2(s) &= \int_{\mathcal{X}} \int_{\substack{r(z) < r(x) \\ s(z) = s(x)}} r(x)p(x)p(z) dz dx - \int_{\mathcal{X}} \int_{\substack{r(z) = r(x) \\ s(z) < s(x)}} r(x)p(x)p(z) dz dx \stackrel{(29,30,31)}{=} \\
 &\quad \frac{1}{2} \int_{\mathcal{X}} \int_{\substack{z \neq x \\ s(z) = s(x)}} \max\{r(x), r(z)\} p(x)p(z) dz dx + \frac{1}{2} \int_{\mathcal{X}} \int_{z=x} r(x)p(x)p(z) dz dx - \frac{1}{2} \int_{\mathcal{X}} \int_{r(z)=r(x)} r(x)p(x)p(z) dz dx.
 \end{aligned}$$

Observe that

$$\begin{aligned}
 \min_{s: \mathcal{X} \rightarrow \mathbb{R}} F_1(s) &= 0, \\
 \min_{s: \mathcal{X} \rightarrow \mathbb{R}} F_2(s) &= \frac{1}{2} \int_{\mathcal{X}} \int_{z=x} r(x)p(x)p(z) dz dx - \frac{1}{2} \int_{\mathcal{X}} \int_{r(z)=r(x)} r(x)p(x)p(z) dz dx,
 \end{aligned}$$

and both minima are attained by a scoring function  $s^* : \mathcal{X} \rightarrow \mathbb{R}$  if and only if conditions (26) and (27) hold for  $s^*$ . Also note that the conditions can be fulfilled, e.g. by any  $s^*$  such that

$$(\forall x, z \in \mathcal{X}) (x \neq z \Rightarrow s^*(x) \neq s^*(z) \wedge r(x) < r(z) \Rightarrow s^*(x) < s^*(z)).$$

□

## References

Stein, E. M. and Shakarchi, R. *Real Analysis: Measure Theory, Integration, and Hilbert Spaces*. Princeton University Press, 2009. ISBN 9781400835560. URL <https://books.google.cz/books?id=2Sg3Vug65AsC>.
